# Supplementary material for: MicroRNA-148a-3p in pericyte-derived extracellular vesicles improves erectile function in diabetic mice by promoting cavernous neurovascular regeneration
Source: Springer Nature journal article supplement (doi:10.1186/s12894-023-01378-4), 2023-12-16

# Figure 1B related uncutted gel images

Representative exposure images

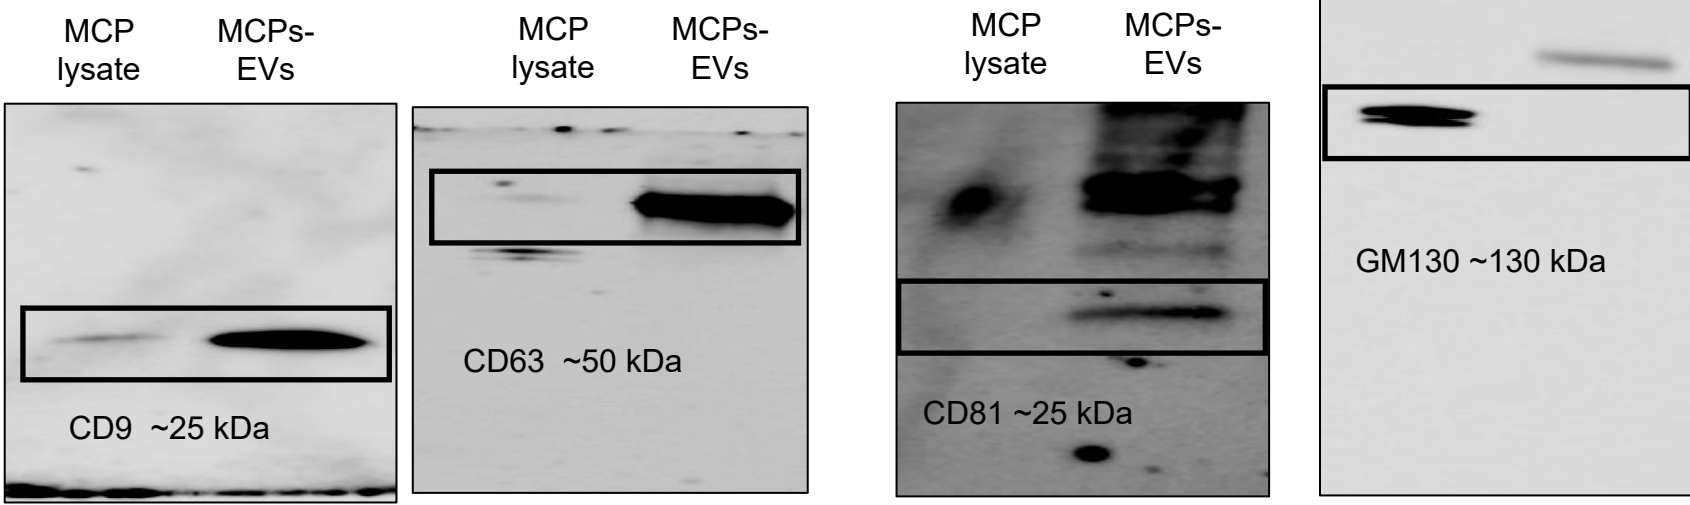

Multiple exposure images

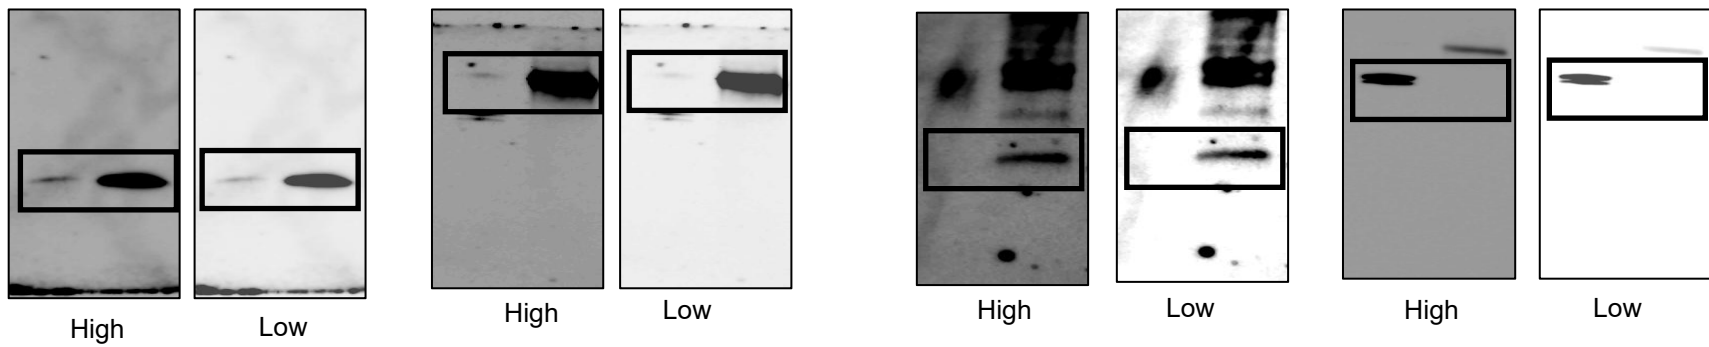

# Figure 6A related uncutted gel images

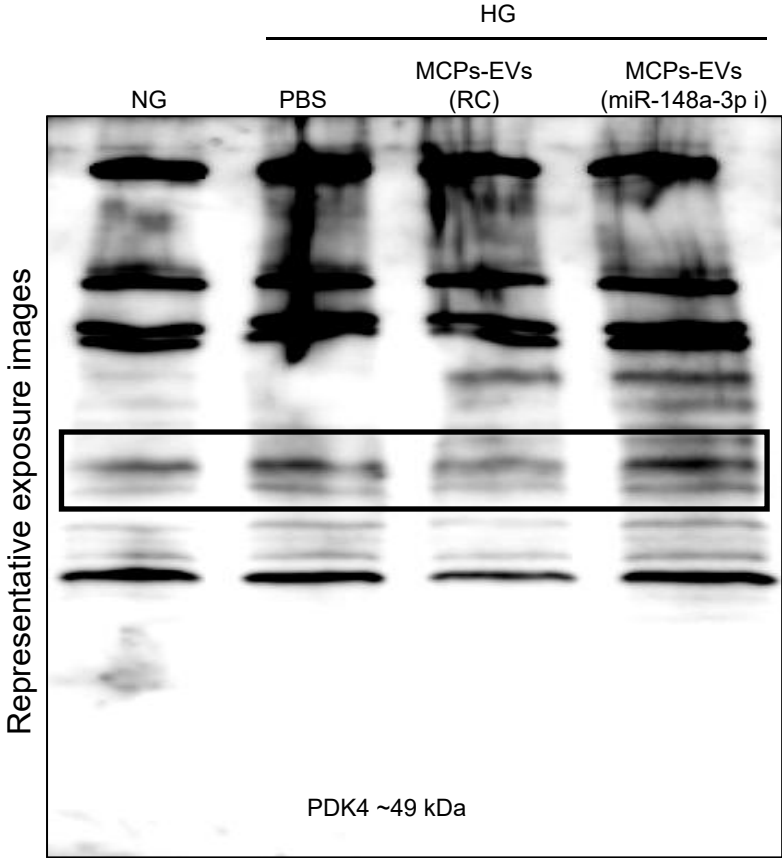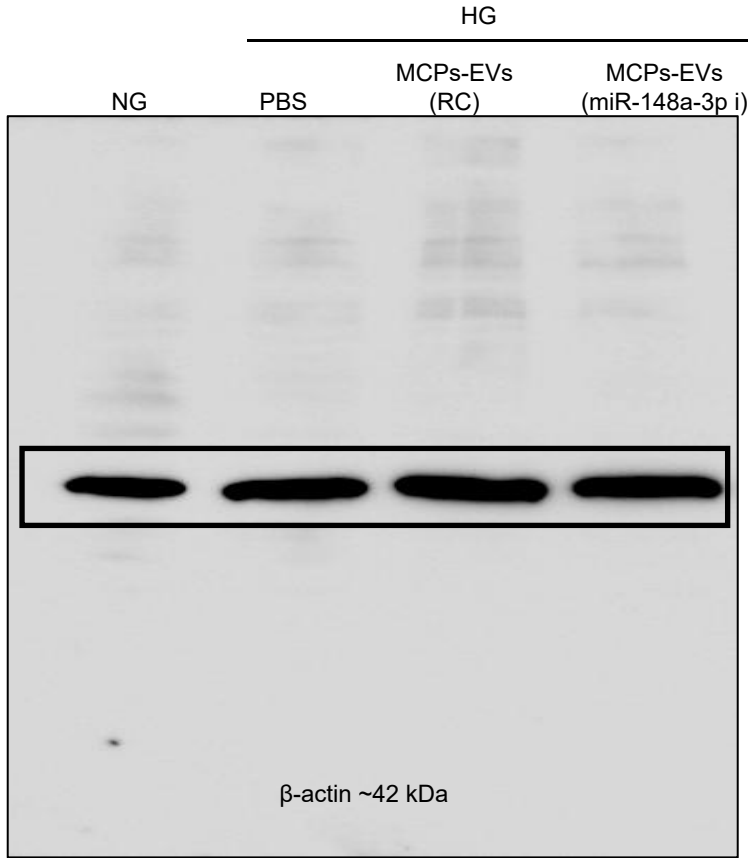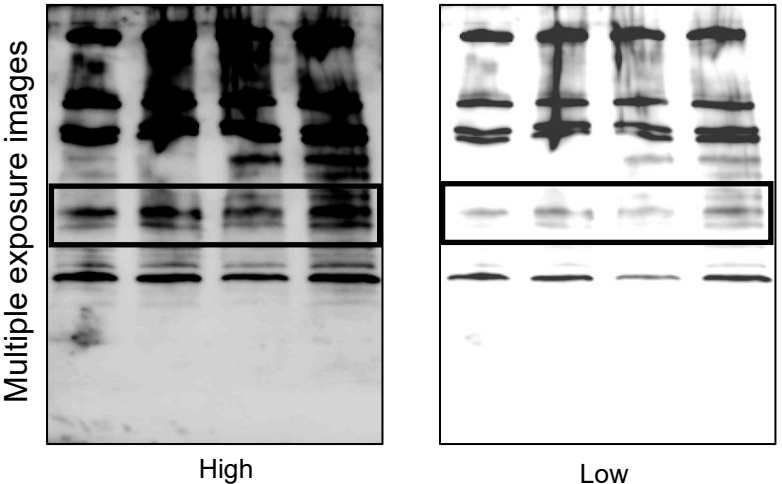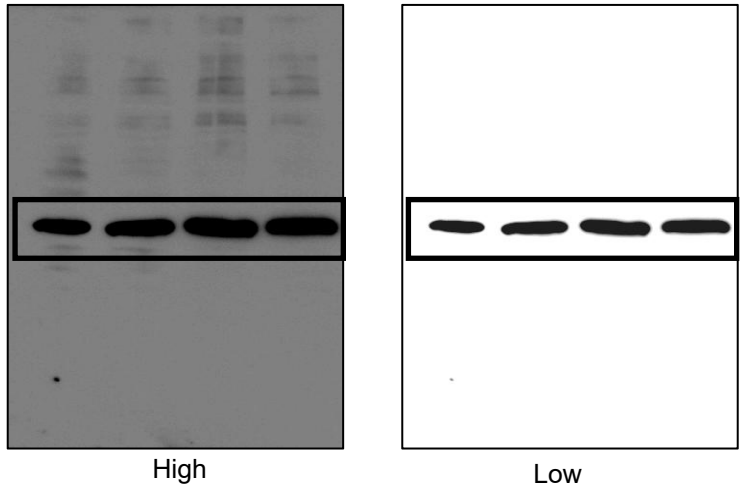

Supplement: MOESM1 [file 26536170]
